# Supplementary material for: Evaluation of Ebola virus disease surveillance system capability to promptly detect a new outbreak in Liberia
Source: HighWire-hosted journal article supplement (doi:10.1136/bmjgh-2023-012369), 2023-08-01
Supplement: bmjgh-2023-012369supp001_data_supplement.pdf [file bmjgh-2023-012369supp001_data_supplement.pdf]

## Supplementary Materials

**Table 1: Distribution of key informant interviews by Institution, Liberia, 2020**

| <b>Institution/Organization</b>                                                  | <b>Number of Key informants</b> | <b>Position/Role</b>                                                                                                                                                                                                                                                                                                 |
|----------------------------------------------------------------------------------|---------------------------------|----------------------------------------------------------------------------------------------------------------------------------------------------------------------------------------------------------------------------------------------------------------------------------------------------------------------|
| Ministry of Health                                                               | 1                               | Director/Health Management Information System                                                                                                                                                                                                                                                                        |
| National Public Health Institute                                                 | 5                               | Surveillance Coordinator/Division of Infectious Disease and Epidemiology; Epidemic Preparedness and Response Coordinator/ Division of Infectious Disease and Epidemiology; Data Manager/ Division of Infectious Disease and Epidemiology; Director/Monitoring and Evaluation; Director/National Reference Laboratory |
| World Health Organization                                                        | 1                               | Technical Assistant/Surveillance and Response                                                                                                                                                                                                                                                                        |
| County Health Team (Montserrado, Lofa, Grand Bassa, Bomi & Rivercess counties)   | 5                               | County Surveillance Officers                                                                                                                                                                                                                                                                                         |
| District Health Team (Montserrado, Lofa, Grand Bassa, Bomi & Rivercess counties) | 10                              | District Surveillance Officers                                                                                                                                                                                                                                                                                       |

**Table 2: Performance indicators for the assessment of Ebola Virus Disease surveillance in Liberia**

| System parameters                                                                                                             | Indicator                                                                               | Denominator/Total sample      | Unit of measurement | Target | Data source                    | Measurement method(s)                                                   |
|-------------------------------------------------------------------------------------------------------------------------------|-----------------------------------------------------------------------------------------|-------------------------------|---------------------|--------|--------------------------------|-------------------------------------------------------------------------|
| <b>Surveillance System Structure</b>                                                                                          |                                                                                         |                               |                     |        |                                |                                                                         |
| <b>Surveillance Legislation (laws &amp; regulations)</b>                                                                      |                                                                                         |                               |                     |        |                                |                                                                         |
| Existence of National legislative support for surveillance and response to EVD                                                | Laws related to EVD surveillance and response recalled across surveillance managers     | Total number of existing laws | Percentage          | 100%   | Key Informants (KI)            | Percent aggregate across all surveillance units                         |
|                                                                                                                               | Surveillance units with a copy of the National Public Health Law (NPHL)                 | 19 Surveillance Units         | Percentage          | 80%    | Paper and electronic documents | Percent aggregate across all surveillance units                         |
| <b>Surveillance strategy and coordination</b>                                                                                 |                                                                                         |                               |                     |        |                                |                                                                         |
| Presence of plan of action (POA) for EVD Surveillance and Response                                                            | Surveillance units with a strategic plan of action for Ebola surveillance and response  | 19 Surveillance Units         | Percentage          | 100%   | Paper and electronic documents | Percent aggregate across all surveillance units through document review |
| Existence of documented roles and responsibilities for EVD surveillance and response at all levels of the surveillance system | Surveillance units with a copy of roles and responsibilities of stakeholders of the EVD | 19 Surveillance Units         | Percentage          | 80%    | Paper and electronic documents | Percent aggregate across all surveillance units through document review |

| <b>System parameters</b>                                                                      | <b>Indicator</b>                                                                                                  | <b>Denominator/Total sample</b> | <b>Unit of measurement</b> | <b>Target</b>           | <b>Data source</b>             | <b>Measurement method(s)</b>                                            |
|-----------------------------------------------------------------------------------------------|-------------------------------------------------------------------------------------------------------------------|---------------------------------|----------------------------|-------------------------|--------------------------------|-------------------------------------------------------------------------|
|                                                                                               | surveillance and response system                                                                                  |                                 |                            |                         |                                |                                                                         |
| <b>Networking and partnership</b>                                                             |                                                                                                                   |                                 |                            |                         |                                |                                                                         |
| Evidence of intersectoral collaboration, networking, and partnership                          | Intersectoral collaboration, networking, and partnership meetings held at the national level in the past one year | NA                              | Number                     | At least 1/quarter/year | Paper and electronic documents | Summary count of observations through document review                   |
| Cross-border collaborations                                                                   | Cross-border collaboration activities implemented at the national level in the past one year                      | NA                              | Number                     | At least 1/quarter/year | Paper and electronic documents | Summary count of observations through document review                   |
| <b>Core functions</b>                                                                         |                                                                                                                   |                                 |                            |                         |                                |                                                                         |
| <b>National County and District levels</b>                                                    |                                                                                                                   |                                 |                            |                         |                                |                                                                         |
| <b>Case detections</b>                                                                        |                                                                                                                   |                                 |                            |                         |                                |                                                                         |
| Mechanism for outbreak detection at managerial levels of the surveillance and response system | Surveillance units with standard case definitions for EVD on file                                                 | 19 Surveillance Units           | Percentage                 | 100%                    | Paper and electronic documents | Percent aggregate across all surveillance units through document review |

| <b>System parameters</b>                                                                                  | <b>Indicator</b>                                                                                                                 | <b>Denominator/Total sample</b> | <b>Unit of measurement</b> | <b>Target</b> | <b>Data source</b>             | <b>Measurement method(s)</b>                              |
|-----------------------------------------------------------------------------------------------------------|----------------------------------------------------------------------------------------------------------------------------------|---------------------------------|----------------------------|---------------|--------------------------------|-----------------------------------------------------------|
|                                                                                                           | Surveillance officers at county and district levels with knowledge on a standard case definition for a suspected case of EVD (6) | 15 Surveillance Officers        | Percentage                 | 100%          | KI                             | Percent aggregate across 3 levels                         |
|                                                                                                           | Surveillance manager at national level with knowledge on standard case definition for a suspected case of EVD                    | 7 Surveillance Officers         | Percentage                 | 100%          | KI                             | Percent aggregate across surveillance at national level   |
|                                                                                                           | Surveillance officers at county and district levels using standard case definitions to validate suspected cases of EVD           | 15 Surveillance Officers        | Percentage                 | 100%          | KI                             | Percent aggregate across 3 levels                         |
| <b>Case registration</b>                                                                                  |                                                                                                                                  |                                 |                            |               |                                |                                                           |
| Mechanisms to record suspected EVD cases at the managerial levels of the surveillance and response system | Surveillance units with line list/databases of suspected EVD cases                                                               | 19 Surveillance Units           | Percentage                 | 100%          | Paper and electronic databases | Percent aggregate across 3 levels through database review |

| System parameters                                     | Indicator                                                                                | Denominator/Total sample                                           | Unit of measurement | Target | Data source                              | Measurement method(s)                                     |
|-------------------------------------------------------|------------------------------------------------------------------------------------------|--------------------------------------------------------------------|---------------------|--------|------------------------------------------|-----------------------------------------------------------|
|                                                       |                                                                                          |                                                                    |                     |        |                                          |                                                           |
| <b>Case reporting</b>                                 |                                                                                          |                                                                    |                     |        |                                          |                                                           |
| Case-based reporting of suspected EVD cases           | Surveillance Officers reporting the use of case-based form to report suspected EVD cases | Total # of suspected case report observed during the recall period | Percentage          | 100%   | Paper and electronic documents           | Percent aggregate across 3 levels through document review |
| <b>Case Confirmation</b>                              |                                                                                          |                                                                    |                     |        |                                          |                                                           |
| Confirmation of epidemic prone disease, including EVD | Samples tested in the past 3 months with results available within 72 hours of reception  | Total # of sample tested during the recall period                  | Percentage          | 80%    | Paper and Electronic Laboratory database | Percent aggregate across 3 levels through database review |

| System parameters                                       | Indicator                                                                                             | Denominator/Total sample                            | Unit of measurement | Target | Data source                                  | Measurement method(s)                                                       |
|---------------------------------------------------------|-------------------------------------------------------------------------------------------------------|-----------------------------------------------------|---------------------|--------|----------------------------------------------|-----------------------------------------------------------------------------|
|                                                         | EVD samples referred from county and district levels within 24 hours in the past 3 months             | Total # of sample referred during the recall period | Percentage          | 100%   | Specimen logbook                             | Percent aggregate across county and district levels through document review |
| Supplies for EVD specimen collection and transportation | Surveillance units reporting no stockout of supplies for EVD specimen collection in the past 3 months | 15 Surveillance Units                               | Percentage          | 80%    | Inventory logs                               | Percent aggregate across appropriate units through document review          |
| <b>Data analysis and interpretation</b>                 |                                                                                                       |                                                     |                     |        |                                              |                                                                             |
| EVD surveillance data analysis and interpretation       | Surveillance units with evidence of descriptive (Person, place and time) analysis of EVD data         | 19 Surveillance Units                               | Percentage          | 80%    | Bulletin boards, walls, electronic documents | Percent aggregate across 3 levels through document review                   |
| <b>Epidemic Preparedness, Response and Control</b>      |                                                                                                       |                                                     |                     |        |                                              |                                                                             |
| Epidemic preparedness plan for Ebola                    | Surveillance units with an epidemic preparedness plan for EVD                                         | 19 Surveillance Units                               | Percentage          | 100%   | Paper and electronic documents               | Percent aggregate across 3 levels through document review                   |
| Emergency funds                                         | Surveillance units with existing and adequate                                                         | 17 Surveillance Units                               | Percentage          | 80%    | Paper and electronic documents               | Percent aggregate across 3 levels                                           |

| System parameters                                         | Indicator                                                                                                                           | Denominator/Total sample                                             | Unit of measurement | Target | Data source                              | Measurement method(s)                                     |
|-----------------------------------------------------------|-------------------------------------------------------------------------------------------------------------------------------------|----------------------------------------------------------------------|---------------------|--------|------------------------------------------|-----------------------------------------------------------|
|                                                           | funds for emergency response                                                                                                        |                                                                      |                     |        |                                          | through document review                                   |
| <b>Feedback</b>                                           |                                                                                                                                     |                                                                      |                     |        |                                          |                                                           |
| Existence of regular feedback                             | Surveillance Officers who received lab results for suspected EVD samples                                                            | Total # of sample referred for confirmation during the recall period | Percentage          | 100%   | Paper and Electronic Laboratory database | Total average percentage score                            |
|                                                           | Surveillance units reporting to have received feedback (bulletins/reports) received from the next higher level in the past 3 months | 15 Surveillance Units                                                | Percentage          | 100%   | Paper and electronic documents           | Percent aggregate across 3 levels through document review |
| <b>Health facility level</b>                              |                                                                                                                                     |                                                                      |                     |        |                                          |                                                           |
| <b>Case detection</b>                                     |                                                                                                                                     |                                                                      |                     |        |                                          |                                                           |
| Mechanism for outbreak detection within health facilities | Health facilities with standard case definitions for Ebola                                                                          | 149 health facilities                                                | Percentage          | 100%   | Paper documents                          | Weighted percentage through direct observation            |
|                                                           | Surveillance Focal Persons with correct knowledge on standard                                                                       | 149 Surveillance Focal Persons                                       | Percentage          | 100%   | Surveillance Focal Person                | Weighted percentage through survey interviews             |

| <b>System parameters</b>                                  | <b>Indicator</b>                                                                                                    | <b>Denominator/Total sample</b> | <b>Unit of measurement</b> | <b>Target</b> | <b>Data source</b>        | <b>Measurement method(s)</b>                   |
|-----------------------------------------------------------|---------------------------------------------------------------------------------------------------------------------|---------------------------------|----------------------------|---------------|---------------------------|------------------------------------------------|
|                                                           | case definitions to detect Ebola                                                                                    |                                 |                            |               |                           |                                                |
| <b>Case reporting</b>                                     |                                                                                                                     |                                 |                            |               |                           |                                                |
| Case-based reporting of suspected EVD cases               | Health facilities with a case-based form for suspected EVD cases                                                    | 149 health facilities           | Percentage                 | 100%          | Paper documents           | Weighted percentage through direct observation |
| <b>Case confirmation</b>                                  |                                                                                                                     |                                 |                            |               |                           |                                                |
| Capacity for sample collection and referrals              | Surveillance Focal Person with “correct” knowledge of sample collection and packaging                               | 149 health facilities           | Percentage                 | 100%          | Surveillance Focal Person | Weighted percentage through survey interviews  |
| Supplies for Ebola specimen collection and transportation | Health facilities without stockout of laboratory supplies related to Ebola specimen collection in the past 3 months | 149 health facilities           | Percentage                 | 80%           | Surveillance Focal Person | Weighted percentage through survey interviews  |
| <b>Data analysis and interpretation</b>                   |                                                                                                                     |                                 |                            |               |                           |                                                |



| <b>System parameters</b>                                            | <b>Indicator</b>                                                                                           | <b>Denominator/Total sample</b> | <b>Unit of measurement</b> | <b>Target</b> | <b>Data source</b>        | <b>Measurement method(s)</b>                   |
|---------------------------------------------------------------------|------------------------------------------------------------------------------------------------------------|---------------------------------|----------------------------|---------------|---------------------------|------------------------------------------------|
| EVD surveillance data analysis and interpretation                   | Health facilities with evidence of descriptive (Person, place, and time) analysis of EVD data              | 149 health facilities           | Percentage                 | 80%           | Paper documents           | Weighted percentage through direct observation |
| <b>Epidemic Preparedness and Control</b>                            |                                                                                                            |                                 |                            |               |                           |                                                |
| Availability of IEC strategy for surveillance and response to Ebola | Health facilities reporting use of EVD data for community mobilization for Ebola surveillance and response | 149 health facilities           | Percentage                 | 80%           | Surveillance Focal Person | Weighted percentage through survey interviews  |
| <b>Feedback</b>                                                     |                                                                                                            |                                 |                            |               |                           |                                                |
| Existence of regular feedback                                       | Health facilities with feedback during supervision                                                         | 149 health facilities           | Percentage                 | 80%           | Surveillance Focal Person | Weighted percentage through survey interviews  |
|                                                                     | Health facilities with monthly feedback from the next higher level                                         | 149 health facilities           | Percentage                 | 80%           | Surveillance Focal Person | Weighted percentage through survey interviews  |
| <b>Support functions</b>                                            |                                                                                                            |                                 |                            |               |                           |                                                |
| <b>National County &amp; District levels</b>                        |                                                                                                            |                                 |                            |               |                           |                                                |
| <b>Standards and guidelines</b>                                     |                                                                                                            |                                 |                            |               |                           |                                                |

| System parameters                                                                            | Indicator                                                                         | Denominator/Total sample | Unit of measurement | Target | Data source                    | Measurement method(s)                                     |
|----------------------------------------------------------------------------------------------|-----------------------------------------------------------------------------------|--------------------------|---------------------|--------|--------------------------------|-----------------------------------------------------------|
| Availability of surveillance guidelines                                                      | Surveillance units with a copy of technical guidelines (2016) for EVD             | 19 Surveillance Units    | Percentage          | 80%    | Paper and electronic documents | Percent aggregate across 3 levels through document review |
| Standard operating procedures for collection, packaging and transportation of Ebola specimen | Surveillance units with SOPs for EVD specimen collection, packaging and transport | 19 Surveillance Units    | Percentage          | 80%    | Paper and electronic documents | Percent aggregate across 3 levels through document review |
| <b>Training</b>                                                                              |                                                                                   |                          |                     |        |                                |                                                           |
| Staff trained on integrated disease surveillance and response                                | Surveillance managers at national level reporting training in IDSR                | 7 managers               | Percentage          | 80%    | KI                             | Percent aggregate across surveillance at national level   |
|                                                                                              | Surveillance officers at county and district levels reporting training in IDSR    | 15 Surveillance officers | Percentage          | 80%    | KI                             | Percent aggregate across 3 levels                         |
| Surveillance units with trained Field Epidemiologist                                         | Surveillance managers at national level reporting training in Field Epidemiology  | 7 Officers/managers      | Percentage          | 80%    | KI                             | Percent aggregate across surveillance at national level   |
|                                                                                              | Surveillance officers at county and district                                      | 15 Surveillance officers | Percentage          | 80%    | KI                             | Percent aggregate across 3 levels                         |

| System parameters                                                                   | Indicator                                                                                      | Denominator/Total sample | Unit of measurement | Target | Data source                    | Measurement method(s)                                     |
|-------------------------------------------------------------------------------------|------------------------------------------------------------------------------------------------|--------------------------|---------------------|--------|--------------------------------|-----------------------------------------------------------|
|                                                                                     | levels reporting training in Field Epidemiology                                                |                          |                     |        |                                |                                                           |
| <b>Supervision</b>                                                                  |                                                                                                |                          |                     |        |                                |                                                           |
| Conduct of Supervisions                                                             | Surveillance units that conducted supervision(s) to immediate lower level in the past 3 months | 15 Surveillance Units    | Percentage          | 80%    | Paper and electronic documents | Percent aggregate across 3 levels through document review |
| Availability of budget for surveillance activities                                  | Proportion of surveillance units with evidence of budget for surveillance activities           | 19 Surveillance Units    | Percentage          | 80%    | KI                             | Percent aggregate across 3 levels                         |
| <b>Health facility level</b>                                                        |                                                                                                |                          |                     |        |                                |                                                           |
| <b>Standards and guidelines</b>                                                     |                                                                                                |                          |                     |        |                                |                                                           |
| Technical Guidelines for Ebola Surveillance and Response                            | Health facilities with Technical Guidelines Ebola Surveillance and Response                    | 149 health facilities    | Percentage          | 80%    | Paper documents                | Weighted percentage through direct observation            |
| Availability of case-based reporting forms at all levels of the surveillance system | Health facilities with no stock out of case-based                                              | 149 health facilities    | Percentage          | 80%    | Surveillance Focal Person      | Weighted percentage through survey interviews             |

| System parameters                                  | Indicator                                                                            | Denominator/Total sample | Unit of measurement | Target | Data source               | Measurement method(s)                                                |
|----------------------------------------------------|--------------------------------------------------------------------------------------|--------------------------|---------------------|--------|---------------------------|----------------------------------------------------------------------|
|                                                    | reporting forms in the past 3 months                                                 |                          |                     |        |                           |                                                                      |
| <b>Training</b>                                    |                                                                                      |                          |                     |        |                           |                                                                      |
| Staff trained on surveillance                      | Health facilities with trained staff in surveillance competences                     | 149 health facilities    | Percentage          | 80%    | Surveillance Focal Person | Weighted percentage through survey interviews                        |
| <b>Supervision &amp; Communication</b>             |                                                                                      |                          |                     |        |                           |                                                                      |
| Mechanism for Supervisions                         | Health facilities reporting supervision from the higher level in the past 3 months   | 149 health facilities    | Percentage          | 80%    | Surveillance Focal Person | Weighted percentage through survey interviews                        |
|                                                    | Health facilities reporting supervision to catchment communities in the past 1 month | 149 health facilities    | Percentage          | 80%    | Surveillance Focal Person | Weighted percentage through survey interviews                        |
| Availability of communication at health facilities | Health facilities with functional phone for reporting of suspected EVD               | 149 health facilities    | Percentage          | 80%    | Surveillance Focal Person | Weighted percentage through survey interviews and direct observation |
|                                                    |                                                                                      |                          |                     |        |                           |                                                                      |

| System parameters                          | Indicator                                                                                  | Denominator/Total sample        | Unit of measurement | Target              | Data source                    | Measurement method(s)                               |
|--------------------------------------------|--------------------------------------------------------------------------------------------|---------------------------------|---------------------|---------------------|--------------------------------|-----------------------------------------------------|
| <b>Surveillance system quality</b>         |                                                                                            |                                 |                     |                     |                                |                                                     |
| <b>National County and District levels</b> |                                                                                            |                                 |                     |                     |                                |                                                     |
| Usefulness                                 | Surveillance units that produced reports/bulletin for decision-making in the past 3 months | 17 Surveillance Units           | Percentage          | 100%                | Paper and electronic documents | Percent aggregate across 3 levels                   |
| Simplicity                                 | Case-based reporting forms required by the system for reporting suspected EVD              | NA                              | Number              | 1                   | KI                             | Summary count of observations through KI interviews |
|                                            | Existing reporting channels required for reporting suspected cases of EVD                  | NA                              | Number              | 1                   | KI                             | Summary count of observations through KI interviews |
| Flexibility                                | Sub-systems with which the EVD system is interoperable                                     | Total # of existing sub-systems | Percentage          | 80%                 | KI                             | Total average percentage score                      |
|                                            | Changes made to EVD case detection and reporting in the past 1 year                        | NA                              | Frequency           | At least 1 per year | KI                             | Summary count of observations through KI interviews |

| <b>System parameters</b>     | <b>Indicator</b>                                                                                                     | <b>Denominator/Total sample</b>                               | <b>Unit of measurement</b> | <b>Target</b> | <b>Data source</b>             | <b>Measurement method(s)</b>      |
|------------------------------|----------------------------------------------------------------------------------------------------------------------|---------------------------------------------------------------|----------------------------|---------------|--------------------------------|-----------------------------------|
| Stability                    | Surveillance units reporting unscheduled electrical power outages that occurred in the past 3 months                 | 17 Surveillance Units                                         | Percentage                 | 0             | KI                             | Percent aggregate across 3 levels |
|                              | Surveillance units reporting EVD surveillance activities unhindered by lack of funds in the past 3 months            | 17 Surveillance Units                                         | Percentage                 | 100%          | KI                             | Percent aggregate across 3 levels |
| Acceptability                | Stakeholders actively participated in surveillance and response activities in the past 3 months                      | Total # of stakeholders required to participate in the system | Percentage                 | 80%           | KI                             | Percent aggregate across 3 levels |
| Representativeness           | Reporting sites that sent weekly surveillance reports (including zero reports) of suspected EVD in the past 3 months | Total # of reporting sites observed during the recall period  | Percentage                 | 100%          | Paper and electronic documents | Percent aggregate across 3 levels |
| <b>Health facility level</b> |                                                                                                                      |                                                               |                            |               |                                |                                   |

| System parameters | Indicator                                                                                                                                                 | Denominator/Total sample       | Unit of measurement | Target | Data source               | Measurement method(s)                         |
|-------------------|-----------------------------------------------------------------------------------------------------------------------------------------------------------|--------------------------------|---------------------|--------|---------------------------|-----------------------------------------------|
| Usefulness        | Health facilities with analysis outputs (table, graph, map, etc.) of EVD surveillance data reported                                                       | 149 health facilities          | Percentage          | 80%    | Surveillance Focal Person | Weighted percentage through survey interviews |
| Simplicity        | Case-based reporting forms required by the system for reporting a suspected EVD case                                                                      | NA                             | Number              | 1      | Surveillance Focal Person | Weighted percentage through survey interviews |
|                   | Existing reporting channels required for reporting suspected cases of EVD                                                                                 | NA                             | Number              | 1      | Surveillance Focal Person | Weighted percentage through survey interviews |
| Stability         | Health facilities with designated phone, access to a mobile cellular network, daily internet services, uninterrupted electricity during operational hours | 149 health facilities          | Percentage          | 85%    | Surveillance Focal Person | Weighted percentage through survey interviews |
| Acceptability     | Respondents that considers EVD surveillance and response activities as part of their routine work                                                         | 149 Surveillance Focal Persons | Percentage          | 80%    | Surveillance Focal Person | Weighted percentage through survey interviews |

| <b>System parameters</b> | <b>Indicator</b>                                                                                                       | <b>Denominator/Total sample</b>        | <b>Unit of measurement</b> | <b>Target</b> | <b>Data source</b>                                                                 | <b>Measurement method(s)</b>                                                                |
|--------------------------|------------------------------------------------------------------------------------------------------------------------|----------------------------------------|----------------------------|---------------|------------------------------------------------------------------------------------|---------------------------------------------------------------------------------------------|
| Representativeness       | Health facilities that sent weekly surveillance reports (including zero reports) of suspected EVD in the past 3 months | 149 health facilities                  | Percentage                 | 100%          | Paper documents                                                                    | Percent aggregate based on survey interviews and document review                            |
| Completeness             | Health facilities without “unknown” or “blanks” to required variables in EVD line list for the past 3 months           | 149 health facilities                  | Percentage                 | 80%           | Paper documents                                                                    | Percent aggregate based on survey interviews and document review                            |
| Sensitivity              | Suspected EVD cases detected by the surveillance system                                                                | Number of suspected EVD cases detected | Percentage                 | 100%          | Healthcare workers interview, IDSR register                                        | Percent aggregate based on follow up interviews with healthcare workers and document review |
| Timeliness               | Suspect EVD cases reported to the next higher level immediately/within 24 hours of detection                           | Number of suspected EVD cases reported | Percentage                 | 100%          | Healthcare workers interview, IDSR register at health facility and district levels | Percent aggregate based on follow up interviews with healthcare workers                     |



| <b>System parameters</b> | <b>Indicator</b>                                 | <b>Denominator/Total sample</b>        | <b>Unit of measurement</b> | <b>Target</b> | <b>Data source</b>                                                                 | <b>Measurement method(s)</b>                                            |
|--------------------------|--------------------------------------------------|----------------------------------------|----------------------------|---------------|------------------------------------------------------------------------------------|-------------------------------------------------------------------------|
|                          | Suspected EVD cases investigated within 48 hours | Number of suspected EVD cases reported | Percentage                 | 100%          | Healthcare workers interview, IDSR register at health facility and district levels | Percent aggregate based on follow up interviews with healthcare workers |

**Table 3: Description of Standardised Patients Scenarios, Liberia, 2020**

| Case                                               | Presentation                                                                                                                                                                                                                                                                                                                        | Preferred management                                                                                                                                                                                                                                                                                                                                                                                                           |
|----------------------------------------------------|-------------------------------------------------------------------------------------------------------------------------------------------------------------------------------------------------------------------------------------------------------------------------------------------------------------------------------------|--------------------------------------------------------------------------------------------------------------------------------------------------------------------------------------------------------------------------------------------------------------------------------------------------------------------------------------------------------------------------------------------------------------------------------|
| A 5-year old child accompanied by mother/caregiver | Visit the health facility and report a history of intermittent fever, unexplained crying, vomiting, and diarrhoea with blood over four days. Have self-medicated with anti-malaria and antibiotics but symptoms persist.                                                                                                            | <p>Enhance Standard (IPC) precautions at all times.</p> <p>Align patient symptoms with standard case definitions for suspected EVD.</p> <p>Probe for risks factors like travel history, contact with someone with similar symptoms and wild/bush animal.</p> <p>Request and collect specimen to confirm EVD; and isolate patient.</p> <p>Report case information immediately (via phone or text) to the appropriate level.</p> |
| A female 18 years and older                        | Visit the health facility and report a history of loss of appetite, nausea, fever, joint pains, and lower abdominal pains. She also complains of seeing her menses (unexpectedly) for longer than usual. These symptoms have lasted for about a week. Have self-medicated with anti-malaria and pain tablets, but symptoms persist. |                                                                                                                                                                                                                                                                                                                                                                                                                                |
| A male 18 years and older                          | Visit the health facility and report weakness, headache, muscles, joint pains, vomiting, watery diarrhoea with blood, and with history of fever. These symptoms have lasted for up to 5 days. Have self-medicated with anti-malaria and antibiotics, but symptoms persist.                                                          |                                                                                                                                                                                                                                                                                                                                                                                                                                |
